# Supplementary material for: Attenuation of Antidepressant Effects of Ketamine by Opioid Receptor Antagonism
Source: Atypon-hosted journal article supplement (doi:10.1176/appi.ajp.2018.18020138), 2018-08-29
Supplement: appi.ajp.2018.18020138.ds001.pdf [file appi.ajp.2018.18020138.ds001.pdf]

 


Psychiatry Online
